1 Modeling the relative role of human mobility, land-use and climate factors on dengue outbreak  
2 emergence in Sri Lanka

3

4

5

6 Ying Zhang<sup>1,2</sup>, Jefferson Riera<sup>3</sup>, Kayla Ostrow<sup>1</sup>, Sauleh Siddiqui<sup>1,4</sup>, Harendra de Silva<sup>5</sup>, Sahotra Sarkar<sup>6</sup>,  
7 Lakkumar Fernando<sup>7</sup>, Lauren Gardner<sup>8,1\*</sup>

8

9 <sup>1</sup>Department of Civil Engineering, Johns Hopkins University, Baltimore, MD 21218, USA

10

11 <sup>2</sup>Department of Earth and Planetary Sciences, Johns Hopkins University, Baltimore, MD 21218, USA

12

13 <sup>3</sup>Department of Environmental Health and Engineering, Johns Hopkins University, Baltimore, MD 21205,  
14 USA

15

16 <sup>4</sup>Department of Applied Mathematics and Statistics, Johns Hopkins University, Baltimore, MD 21218,  
17 USA

18

19 <sup>5</sup>Department of Pediatrics, University of Colombo, Colombo, 00900, Sri Lanka

20

21 <sup>6</sup>Department of Philosophy, Department of Integrative Biology, University of Texas at Austin  
22 Austin, TX, 78712

23

24 <sup>7</sup>Centre for Clinical Management of Dengue and Dengue Haemorrhagic Fever, Negombo, 11500, Sri Lanka

25

26 <sup>8</sup>School of Civil and Environmental Engineering, University of New South Wales (UNSW) Sydney,  
27 Sydney, NSW, 2052 Australia

28

29 \*Corresponding Author: [l.gardner@unsw.edu.au](mailto:l.gardner@unsw.edu.au), (+61 (02) 9385 5562)

30

31

32 Email of other authors:

33 Ying Zhang: [ying.zhang@jhu.edu](mailto:ying.zhang@jhu.edu)

34 Jefferson Riera: [jriera1@jhu.edu](mailto:jriera1@jhu.edu)

35 Kayla Ostrow: [kostrow5@jhu.edu](mailto:kostrow5@jhu.edu)

36 Sauleh Siddiqui: [siddiqui@jhu.edu](mailto:siddiqui@jhu.edu)

37 Harendra de Silva: [harendra51@gmail.com](mailto:harendra51@gmail.com)

38 Sahotra Sarkar: [sarkar@austin.utexas.edu](mailto:sarkar@austin.utexas.edu)

39 Lakkumar Fernando: [lakkumar@gmail.com](mailto:lakkumar@gmail.com)

40

41 **Abstract**

42 We present a statistical modeling framework to evaluate the spatial-temporal dynamics of the 2016-2017  
43 dengue outbreak in the Negombo region of Sri Lanka as a function of human mobility, land-use, and  
44 climate patterns. The analysis was conducted at a  $1 \text{ km} \times 1 \text{ km}$  spatial resolution and a weekly temporal  
45 resolution. Our results indicate human mobility to be a significantly stronger indicator for local outbreak  
46 clusters than land-use or climate variables, thus highlighting the potential value of using travel data to  
47 target vector control within a region. The minimum daily temperature was identified as the most  
48 influential climate variable on dengue cases in the region; while among the set of land-use patterns  
49 considered, urban areas were found to be most prone to dengue outbreak, followed by areas with stagnant  
50 water and coastal areas. The results are shown to be robust across spatial resolutions. In addition to  
51 illustrating the relative relationship between various potential risk factors for dengue outbreaks, the results  
52 of our study can be used to predict where and when new cases of dengue are likely to occur within a  
53 region, and thus help more effectively and innovatively, plan for disease surveillance and vector control.

54

55 **Keywords:** dengue; outbreaks; risk factors; human mobility; climate; land-use; spatial-temporal dynamics;  
56 statistical modeling, Sri Lanka

57

58

59

## 60 1. Introduction

61 Dengue is a mosquito-borne viral disease that infects approximately 390 million people globally every  
62 year, particularly in tropical and subtropical countries (1, 2). The high number of infections combined  
63 with the lack, as yet, of an effective vaccine has made dengue a notorious public health problem (2, 3).

64  
65 Dengue spreads through the bite of infected *Aedes* mosquitoes, especially *Aedes aegypti*– the primary  
66 vector, with an estimated 15 to 17-day delay between the primary and secondary human infections (4).  
67 Dengue outbreak control is a challenge for policy makers because *Aedes aegypti* mosquitoes are well  
68 adapted to high density urban environments and actively feed during the day (5-7), thus presenting an  
69 elevated risk to humans. Urban settings provide an ideal habitat for *Aedes aegypti* breeding due to an  
70 abundance of discarded trash bags, plastic bottles, tires, and other containers that enable the formation of  
71 stagnant shallow water surfaces after precipitation (8). Urban regions in developing countries are  
72 particularly vulnerable due to a lack of indoor plumbing infrastructure that, in conjunction with a lack of  
73 air-conditioning, results in higher human-mosquito exposure rates during the day. Additionally, because  
74 of the daytime feeding behaviors of *Aedes aegypti*, common vector control measures that work for  
75 night-biting mosquitoes, such as bed nets, fail to effectively control dengue transmission. Given these  
76 challenges, there is a need to better understand and predict dengue outbreaks and transmission risk within  
77 urban regions in developing countries so that vector control and surveillance resources can be optimally  
78 allocated.

79  
80 Previous studies highlighted human mobility as a critical factor for dengue transmission (9-15), which  
81 contrasts the more minor role travel plays in the spread of vector-borne diseases transmitted by  
82 night-biting mosquitoes (15). While *Aedes aegypti* mosquitoes have a hard time dispersing geographically  
83 across large areas because they rarely travel more than 400m from where they emerge as adults (16-19),  
84 humans regularly travel much longer distances on a daily basis. As new dengue cases and clusters are  
85 regularly reported kilometers apart, it is likely that human mobility play a critical role in the spread of  
86 dengue outbreaks, *i.e.*, infected humans introduce dengue into new mosquito populations at their trip ends.  
87 As an example, Vazquez-Prokopec, Montgomery (12) studied the pattern of dengue transmission using  
88 location-based contact tracing on infected dengue patients during a dengue outbreak centered at Cairns,  
89 Australia. They collected locations that the patients frequently traveled to during the daytime and 2-4  
90 weeks prior to the onset of symptoms through phone interviews. The contact locations with a proximity of  
91 100 meters and a separation of 20 days were spatial-temporally linked into pairs and then chains to  
92 identify the plausible sites of dengue virus transmission. They showed that the complex pattern of dengue  
93 transmission was primarily driven by human mobility, and that targeted residual spaying could potentially  
94 reduce the probability of dengue transmission up to 96%. Their study highlights the importance of  
95 understanding dengue transmission patterns to optimize the allocation of dengue prevention and  
96 vector-control measures.

97  
98 In addition to human mobility, recent studies have pointed to a strong association between climate  
99 conditions and dengue outbreaks at various locations and across different temporal resolutions (8, 20-24).  
100 Precipitation, mean temperature and temperature fluctuation were revealed to affect the population  
101 dynamics of *Aedes aegypti* mosquitoes and the dengue virus extrinsic incubation period (25-29).  
102 Specifically, a suitable average temperature and moderate temperature fluctuations are often favorable for  
103 dengue transmission (25), while an increase in precipitation is strongly associated with the onset of a  
104 dengue outbreak (22). Humidity, a combined effect of precipitation and temperature, is also a common  
105 climate index to evaluate the environmental capacity for dengue emergence (20, 21, 30, 31). Wesolowski,  
106 Qureshi (13) accounted for both climate and mobility in a study of dengue virus transmission over a large  
107 dengue outbreak period in Pakistan. They developed an epidemiological model that included temperature  
108 and relative humidity as input parameters for mosquito dynamics, as well as biting rate to capture the  
109 interactions between human and mosquito hosts. Human mobility was captured using mobile phone data

110 of ~40 million subscribers to estimate the spatially explicit travel volume, albeit not differentiating  
111 infected and non-infected people. They showed that the emergence of dengue epidemics in a new region  
112 could be predicted using aggregated travel patterns from endemic areas in combination with the  
113 developed epidemiological model. While climatic factors were found to be significant for prediction, this  
114 was in part due to the large study region, *i.e.*, country level, which has variable climatic suitability for the  
115 mosquito vector. The study region considered in our work is much smaller and has minimal climactic  
116 variability, thus alternative methods are required to distinguish site-specific risk.

117  
118 Land-use patterns — indicators of human activities and potential breeding habitats — have also been  
119 linked to dengue outbreaks (32-37). Previous studies investigated the effect of land-use patterns on the  
120 spread of dengue and found that human settlements, water bodies, and mixed horticulture are the top three  
121 associated land-use patterns for dengue emergence in Malaysia (35). In another study (36), areas  
122 surrounded by rice paddies and marshes/swamps were associated with a significantly higher population of  
123 dengue vectors during the rainy season in Thailand. Orchards (which often contain artificial water  
124 containers) and irrigation fields have also been shown to play an important role in dengue infections;  
125 however, their role varies given different local conditions. Sometimes, land-use type can be a proxy for  
126 other features, such as socio-economic factors, which may have a contradictory effect on dengue  
127 infections (37).

128  
129 In this study, we present a statistical modeling framework to evaluate the relative role of human travel  
130 patterns, climate conditions, and land-use patterns on dengue outbreak dynamics in Negombo, Sri Lanka  
131 (Figure 1). With more than 80,000 dengue cases including 215 deaths reported nationally in less than  
132 seven months at the beginning of 2017, the recent dengue outbreak in Sri Lanka increased the number of  
133 reported cases by 4.3 times compared to the average number over 2010-2016 (38). The region of  
134 Negombo, located in the Western province, experienced the greatest number of dengue cases in the  
135 country; approximately 45% of the cases nationwide by July 2017 (Figure 1). We applied a mixed-effects  
136 model, where the mobility data bridges the time-varying, spatially-invariant climate variables and the  
137 rasterized spatially explicit, time-invariant population and land-use variables, to capture the  
138 spatial-temporal dynamics of dengue transmission. Our model framework differs from previous studies  
139 that simulated the transmission process (12, 13, 39), and instead focuses on estimating the timing and  
140 location of new case introductions through a non-process based statistical model. Specifically, we focus on  
141 modeling the home locations of (newly infected) dengue patients, and assume dengue is introduced in  
142 new areas by infected individuals who travel to the area. This assumption is consistent with previous  
143 studies that have shown visits to a household by infected people determines the infection risk in that  
144 household (11). In addition, the study was conducted at a fine-grained spatial and temporal resolution —  
145 1 km × 1 km spatially and one week temporally — providing an improved understanding of the role of  
146 mobility in the spread of dengue. While previous work studied the impact of mobility (12, 13), climate (8,  
147 20, 22, 25), and land-use (35-37) separately on dengue, the authors are unaware of any existing study that  
148 considers these factors within a single integrated framework. Thus, previous studies have been unable to  
149 quantify the relative contribution of each factor on the spatial-temporal patterns of dengue transmission as  
150 we do. The results from our study indicate that mobility is a much more significant predictor of new  
151 dengue case clusters compared with land-use and climate data alone. Furthermore, the case study in Sri  
152 Lanka provides critical insights into effective application of dengue prevention and vector control  
153 measures in developing regions.

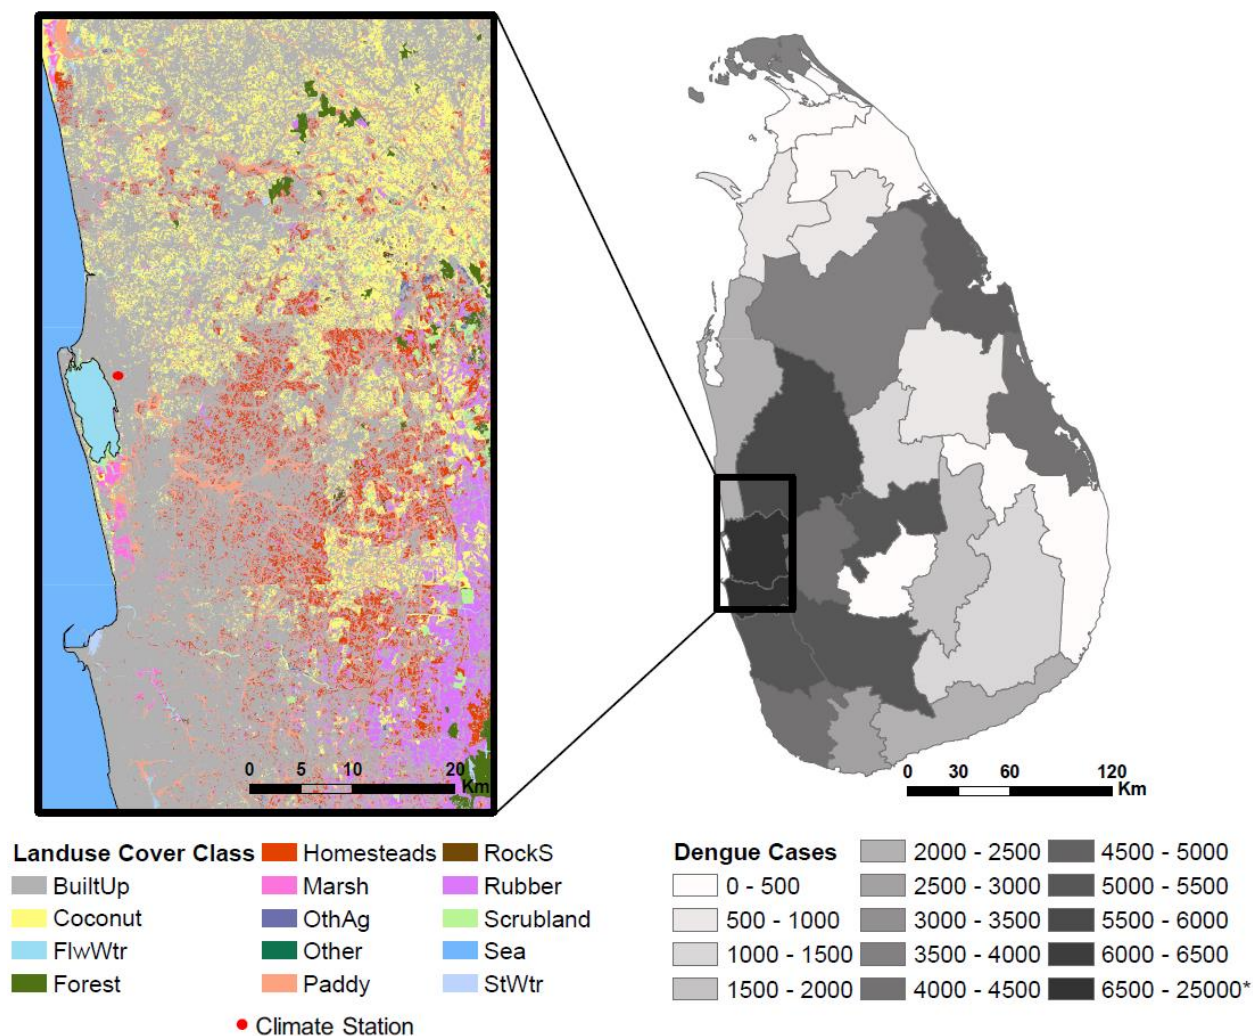

154

155 **Fig. 1.** Land-use groups and the climate station in the study region of Negombo, Sri Lanka (left), and the  
 156 total number of dengue cases at the district level in Sri Lanka (40) during the months from October 2016  
 157 to June 2017 that cover our study period (right).

## 158 2. Data and Methods

159 A statistical model is applied to investigate the spatial-temporal dynamics of dengue outbreak with  
 160 respect to a range of potential explanatory variables. The complete set of potential explanatory variables  
 161 is listed in Table 1. Detailed descriptions of the data followed by a description of the methodology are  
 162 provided below.

163

### 164 (a) Case and Mobility Data

165 A patient survey was conducted among dengue patients in the Negombo region of Sri Lanka over an  
 166 approximately 8-month period during a major outbreak spanning from end of October 2016 to early July  
 167 2017. Data were collected from all patients admitted to the special High Dependency Unit (HDU) for  
 168 critically ill dengue patients within the Clinical Centre for Managing Dengue and Dengue Haemorrhagic  
 169 Fever (CCMDDHF) at the Negombo Hospital in Negombo, Sri Lanka. Specifically, the date of admission,  
 170 home address, the complete set of locations visited, and corresponding trips made between all locations  
 171 during the 10-days prior to hospital admission were collected from all HDU CCMDDHF admitted



172 patients for the entire study period. The case data provide spatial-temporal information on the outbreak  
173 patterns, while the mobility data collected captures daily travel activity of the admitted dengue patients.  
174 The data were collected by trained students and supervised by a Senior House Officer on site. For  
175 weekday admissions the patients were surveyed upon admittance, for night admissions data were  
176 collected the following day, and for weekend admissions on the following Monday. The majority of  
177 admissions were 48 to 72 hours following the onset of fever. Dengue infection was confirmed for the  
178 patient set using either NS1 antigen or IgM antibody diagnostic test.

179

#### 180 **(b) Climate Data**

181 We used the Global Surface Summary of the Day (GSOD) daily weather data (41) from a station in  
182 Negombo (Figure 1) to explore the impact of climate factors on the dengue outbreak. The location of the  
183 weather station (7.18°N, 79.87°E) is approximately in the center of the study region and it is the only  
184 station that falls into our study region with a comprehensive set of climate data available during the study  
185 period. There are several global reanalysis products that provide spatial-explicit climate data during the  
186 study period; however, upon evaluation against the station observations, these globally gridded data sets  
187 did not provide accurate representations of the local climate variables, particularly at a daily time-step  
188 (Figure S1). Hence, the weather data are assumed to be representative for the region which has relatively  
189 homogeneous weather patterns (42). We selected a range of potential climate variables based on previous  
190 studies (8, 20-22, 25-31), including daily mean temperature ( $T_{avg}$ ), daily maximum temperature ( $T_{max}$ ),  
191 daily minimum temperature ( $T_{min}$ ), diurnal temperature range ( $DTR$ ), precipitation ( $Pre$ ), the number of  
192 raining days ( $RD$ ), and relative humidity ( $RH$ ) to analyze climatic influence for the weeks before and  
193 during the same period of analysis that the mobility data was collected.

194

#### 195 **(c) Population and Land-use Data**

196 We used a global population data layer based on Landsat 2016 (43), that is available at an  
197 approximately 1 km × 1 km resolution to represent the population distribution spatially. We aggregated  
198 the data to 5 km × 5 km grid for additional analysis with a coarser spatial resolution. Land-use data (44)  
199 were obtained from the Sri Lanka Survey Department which performed an initial survey in 2000 and has  
200 since continuously updated the maps. The map was extracted for our region of interest and reclassified  
201 into several groups (Figure 1): *Sea*, *Standing Water (StWtr)*, *Flowing Water (FlwWtr)*, *Coconut*, *Marsh*,  
202 *Paddy*, *Built-up (BuiltUp)*, *Scrubland*, *Homesteads*, *Forest*, *Rubber*, *Rock/Sand (RockS)*, *Other*  
203 *Agriculture (OthAg)*, and *Other*. Water bodies were categorized depending on the potential effect on  
204 dengue transmission dynamics. Additional details on land-use classification groupings and processing is  
205 available in the supplementary material.

206

#### 207 **(d) Data Processing and Statistical Model**

208 We divided the study region (Figure 1) into a grid at a 1 km × 1 km resolution and aggregated daily data  
209 into a 1-weekly resolution. The number of patients who were admitted to the hospital during each week of  
210 the recorded time period was used to generate the weekly number of newly admitted dengue patients in  
211 each cell based on their home locations.

212

213 To incorporate the role of mobility into the model we used the travel itineraries provided by the patients  
214 to generate a time-dependent connectivity matrix, which represented the total number of trips made by  
215 dengue infected patients between each pair of cells for each week of the study period. The travel data  
216 included all destinations visited each day during the 10 days preceding hospital admittance (the time  
217 interval that the patient is assumed to be able to spread the disease) for each patient. The number of daily  
218 trips between each pair of cells was summed over all patients, to provide daily trip volumes between cells,  
219 and then aggregated to the weekly level. For each cell the total incoming weekly trips was summed to  
220 define our ‘trip’ variable, which is the total number of trips made by infected dengue patients entering a  
221 given cell  $i$  in a given week  $t$ ,  $V_t^i$ , and was used as a spatial-temporal explanatory variable in the model.  
222 The same method was used for the 5 km × 5 km analysis.

223  
224 Climate variables were averaged or aggregated temporally to a weekly resolution, including weekly  
225 average  $T_{avg}$ ,  $T_{min}$ ,  $T_{max}$ ,  $DTR$ ,  $RH$ , weekly total  $Pre$ , and  $RD$ . Land-use data were aggregated spatially  
226 to match the targeted spatial grid resolution. The population data were in an original resolution that  
227 matched the  $1\text{ km} \times 1\text{ km}$  grid. For land-use, the percentage of occupied land of each type was determined  
228 for each  $1\text{ km} \times 1\text{ km}$  grid cell. Both were subsequently aggregated to a  $5\text{ km} \times 5\text{ km}$  grid.

229 A mixed-effects model combined with backward elimination of insignificant fixed effects was applied to  
230 investigate the spatial-temporal dynamics of dengue outbreak with the potential explanatory variables at a  
231 weekly time step and  $1\text{ km} \times 1\text{ km}$  spatial resolution. In building the model we first conducted sensitivity  
232 analysis to identify the optimal set of climatic variables to include in the model, and corresponding time  
233 lag for each of them. Among the climate variables, significant correlations were observed for weekly  
234 averaged daily mean temperature ( $T_{avg}$ ), daily minimum temperature ( $T_{min}$ ), and diurnal temperature  
235 range ( $DTR$ ) with a lead time ranging from 7 days to 17 days prior to the weekly admitted number of  
236 patients ( $N_t$ ), where the lead time ( $d_c$ ) is the lag in days between the climate variable and  $N_t$  (Figure S2).  
237 Regression models based on different combinations of the climate variables and lead time were developed  
238 and compared; the best performance model was select based on  $F$ -test and adjusted- $R^2$ . As a result,  $T_{min}$   
239 with an optimal lead time of 10 days was included in the final set of mixed-effects models to account for  
240 the partial influence of climate on the dengue outbreak ( $R^2 = 0.248$ ;  $adj. R^2 = 0.226$ ). This is consistent  
241 with previous findings (29) that daily minimum temperature were associated with increase in the larval  
242 abundance. We assumed a relatively homogenous climate over the study region, thus  $T_{min}$  does not vary  
243 spatially over the study region.

244  
245 Along with the chosen climate variable,  $T_{min}$ , the remaining set of potential explanatory variables (Table  
246 1) was taken into the mixed-effects model initially, with population included in the spatial random effects.  
247 Population density was incorporated using random effects in the model because population is likely to  
248 have spatially heterogeneous effects on dengue outbreaks (39, 45). For example, high population areas  
249 may imply access to tap water and better living conditions which could restrict dengue transmission (46),  
250 while the higher density of population facilitates disease spread. Furthermore, there could be spatial  
251 variance in the distribution of people living in a particular area. In addition to mobility, climate, and  
252 land-use variables; the number of new cases in a given cell in the weeks prior were added as explanatory  
253 variables to account for autocorrelations in the case data. Subsequently, the variable with the most  
254 insignificant fixed-effects coefficient was eliminated each iteration, until only variables with significant  
255 coefficients (at 95% significance level) remained in the model. A range of lead time for  $V_t^i$  prior to the  
256 admitted week was also tested. A separate analogous process was conducted using a  $5\text{ km} \times 5\text{ km}$   
257 resolution, to test the sensitivity of model results across spatial resolutions, and the robustness of the  
258 modeling framework and findings.

259  
260 Thus, the mathematical representation of the model is given by:

261  
262 
$$N_t^i = \sum_{l \in \bar{L}} \alpha_l l^i + \sum_{c \in \bar{C}} \beta_c c_{t,d_c} + \sum_u \gamma_u V_{t-u}^i + \sum_w \delta_w N_{t-w}^i + a^i + b^i P^i + \varepsilon_t^i$$

263  
264 Where

265  
266  $i$  is the cell index;  $i = 1, 2, \dots$   
267  $l$  is the land-use variable, which belongs to the land-use group set  $\bar{L}$ , where  $\bar{L}$  includes *Sea, StWtr, FlwWtr,*  
268 *Coconut, Marsh, Paddy, BuiltUp, Scrubland, Homesteads, Forest, Rubber, RockS, OthAg, and Other.*  
269  $l^i$  is the occupation percentage of land-use group  $l$  in cell  $i$ , time-invariant.  
270  $P^i$  is the population in cell  $i$ , time-invariant

271  $t$  is the time index at weekly resolution;  $t = 1, 2, \dots$   
 272  $N_t^i$  is the number of patients who are admitted to the hospital during week  $t$ , whose home locations are in  
 273 cell  $i$   
 274  $N_{t-w}^i$  is the number of patients who are admitted to the hospital during week  $t-w$ , whose home locations  
 275 are in cell  $i$ , where  $w$  is measured in weeks;  $w = 1, 2, \dots$   
 276  $V_{t-u}^i$  is the number of total number of trips made into cell  $i$  during the week  $t-u$ , where  $u$  is measured in  
 277 weeks;  $u = 1, 2, \dots$   
 278  $c$  is the climate variable which belongs to the climate variable set  $\bar{C}$ .  $\bar{C}$  includes  $T_{avg}$ ,  $T_{max}$ ,  $T_{min}$ ,  $DTR$ ,  
 279  $Pre$ ,  $RD$ , and  $RH$ .  
 280  $c_{t,d_c}$  is the climate variable during the week that begins  $d_c$  days prior to the start of week  $t$ .  $d_c$  ranges  
 281 from 7 to 17 days and can be different for different climate variables. Multiple climate variables can be  
 282 included in the model.  
 283  $\varepsilon_t^i$  is the model residuals associated with cell  $i$  and week  $t$ .  
 284  $\alpha_l$  is the estimated fixed-effects coefficient for  $l$ .  
 285  $\beta_c$  is the estimated fixed-effects coefficient for  $c$ .  
 286  $\gamma_u$  is the estimated fixed-effects coefficient for  $V_{t-u}^i$ .  
 287  $\delta_w$  is the estimated fixed-effects coefficient for  $N_{t-w}^i$ .  
 288  $a^i$  is the intercept associated with cell  $i$ .  
 289  $b^i$  is the estimated spatial random-effects coefficient for  $P^i$ .

### 290 3. Results

#### 291 (a) Data Analysis

292 The number of admitted dengue patients aggregated over the study region peaks during December and  
 293 June (Figure 2), aligned with the monsoon months (47). Figure 2A illustrates the relationship between the  
 294 total number of dengue patients,  $N_t$ , admitted during each week  $t$  and the total number of recorded patient  
 295 trips during the same week ( $V_t$ ). Figure 2B illustrates  $N_t$  and the weekly averaged minimum daily  
 296 temperature in week  $t$  ( $T_{min_t}$ ). It shows a lagged relationship of  $N_t$  with  $T_{min_t}$ , mostly in the same  
 297 direction. For the purposes of these graphics, the variables are aggregated over the entire study region.  
 298

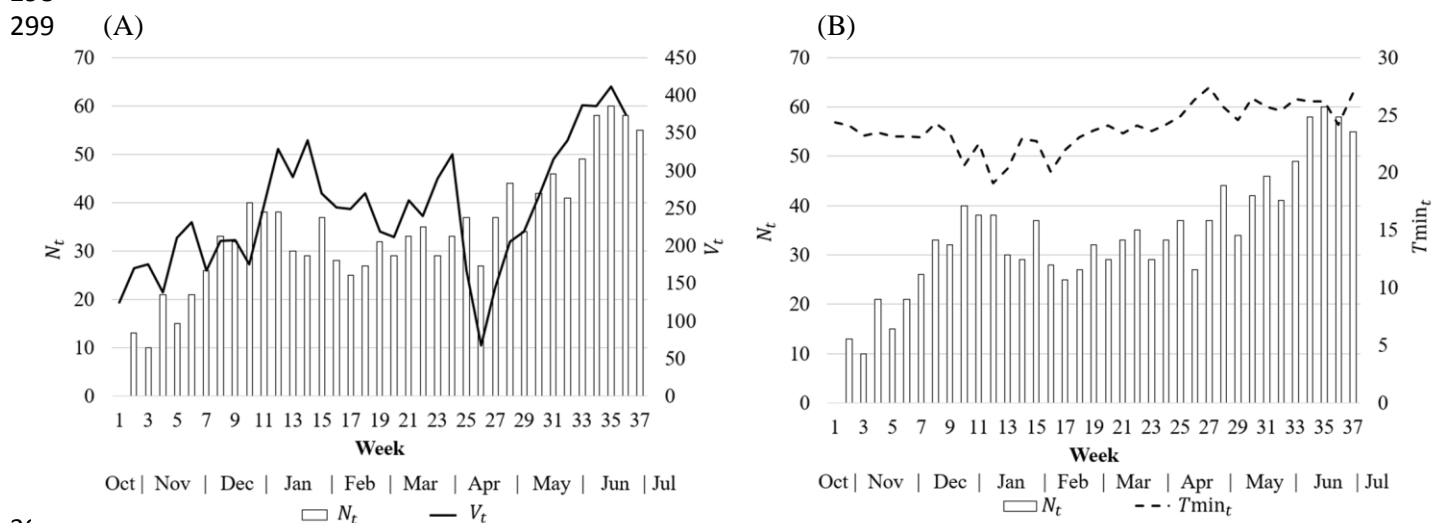

300  
 301 **Fig. 2.** The number of admitted dengue patients in week  $t$  ( $N_t$ ) and (A) the number of recorded trips in  
 302 week  $t$  ( $V_t$ ) summed over the entire study region, and (B) the weekly averaged minimum daily  
 303 temperature ( $T_{min_t}$ ).

304



305 The travel destinations recorded in our study include medical facilities, homes, workplaces, schools, and  
306 others (Figure S3). Additional analysis performed reveals that a vast majority of trips were longer than the  
307 distance a mosquito can travel. Specifically, 96.6% of the trips were longer than 0.4 km (Table S1; Figure  
308 S4), outside the range of a mosquito's maximum travel distance (16-19), further supporting the role  
309 human mobility is likely to play in the outbreak.

310  
311 Figure 3 illustrates both the spatial-temporal distribution of dengue patients' home locations over the  
312 course of the outbreak, and the corresponding travel patterns of the patients during 5-week periods. The  
313 patient home locations were well distributed over the area of the study region for the first few months of  
314 the outbreak, with correspondingly scattered travel patterns. However, as the outbreak progressed, the  
315 recorded case locations and the trip ends of newly infected dengue patients became more concentrated  
316 near the town center and just above the lake. There were also a large amount of trips (>100) within the  
317 cell near the town center.

318

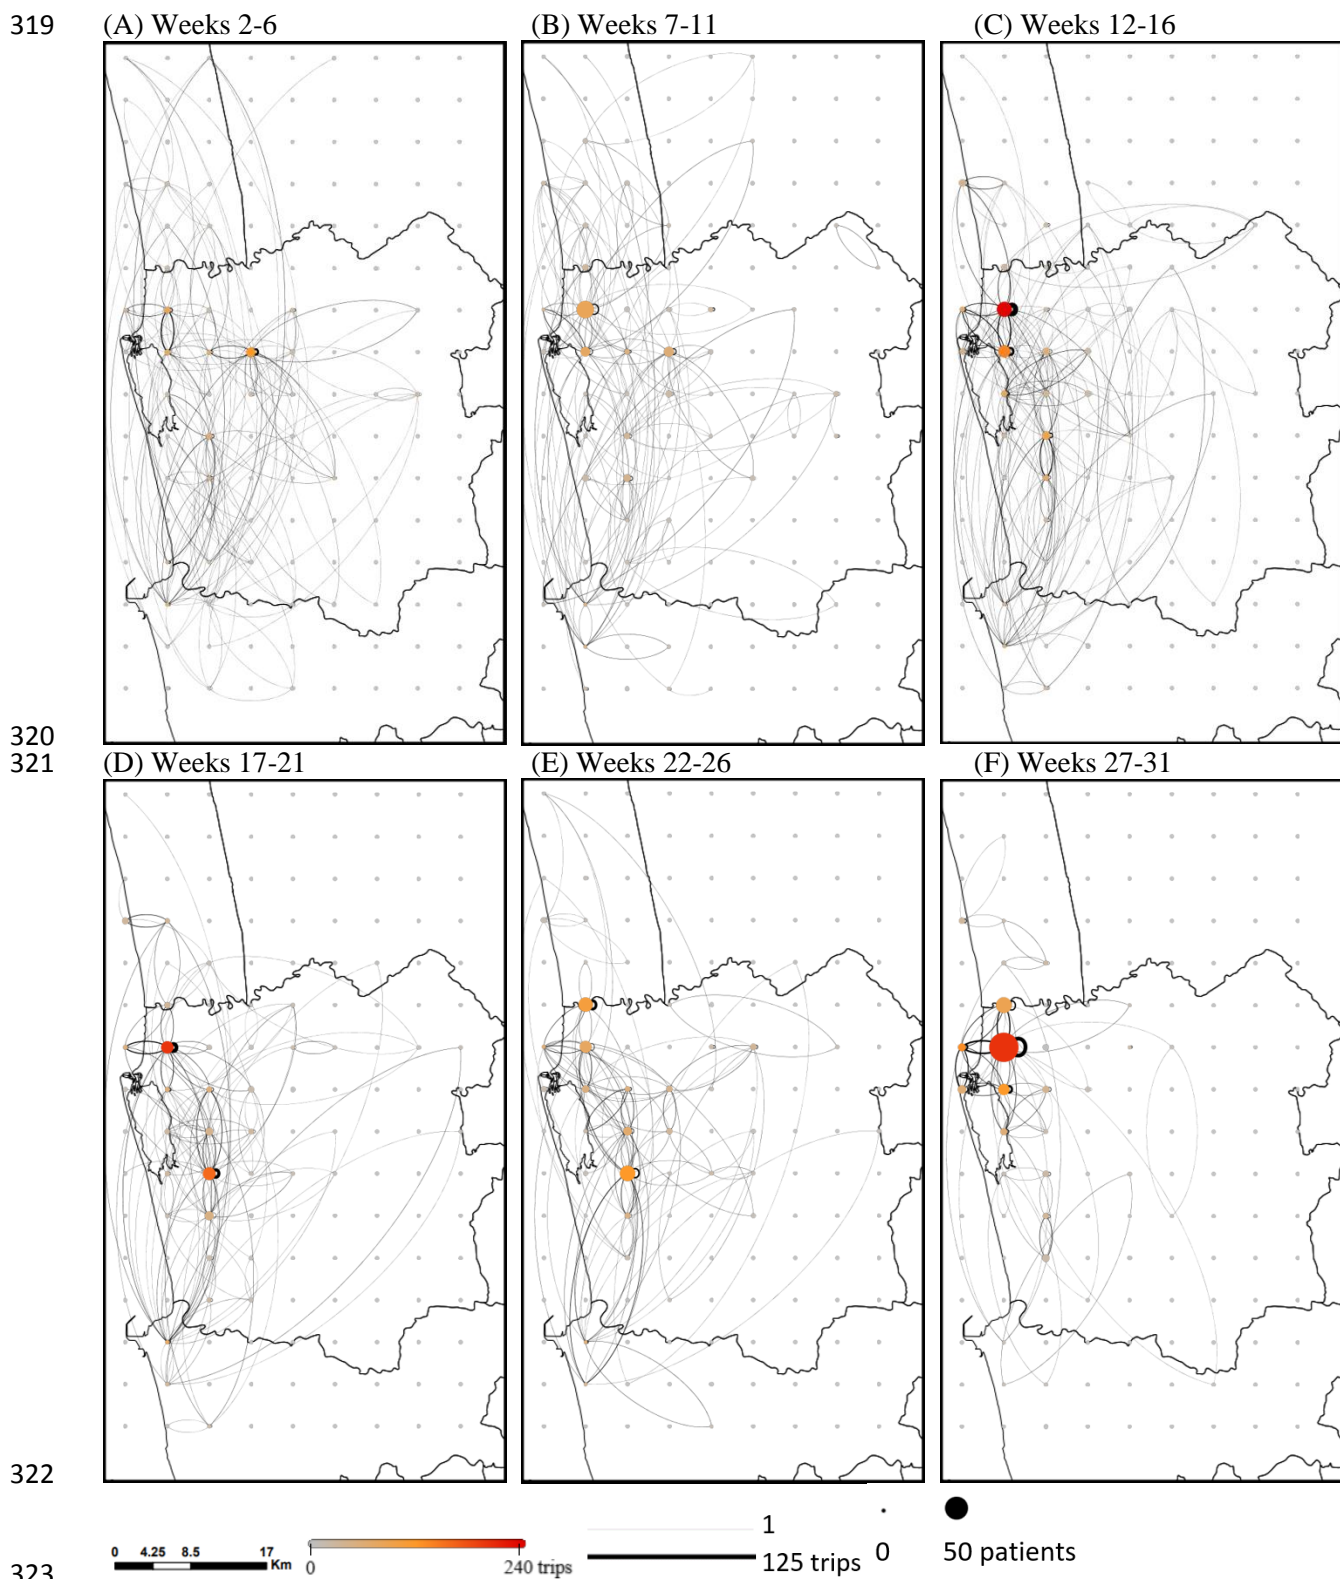

324 **Fig. 3.** Weekly number of patients and the number of trips summed over 5-week intervals for a 5 km × 5  
325 km resolution. Patient home locations are plotted as the case location. The size of the circle indicates the  
326 number of patients admitted during the time period. The color of the circle indicates the number of trips

327 that end in the grid cell during the time period. The thickness of the line is proportional to the number of  
 328 trips made between two locations. Week 2 begins on October 27, 2016 and week 31 begins on May 18,  
 329 2017. For visual clarity, the 5 km × 5 km resolution was used for the figure, instead of 1 km × 1 km.

330  
 331 **(b) Model Results**  
 332 A mixed-effects model was developed to estimate the number of new dengue cases in a given cell in a  
 333 given week as a function of the mobility patterns of individuals infected with dengue in the preceding  
 334 week(s), as well as land-use and climate data from days prior.

335 **Table 1: Summary of potential explanatory variables**

336

| Variables         | Description                                                                | Properties                             |
|-------------------|----------------------------------------------------------------------------|----------------------------------------|
| $l^i$             | occupation percentage of land-use group $l$ in cell $i$ (%)                |                                        |
| <i>BuiltUp</i>    | urban area                                                                 |                                        |
| <i>Coconut</i>    | coconut cultivation land                                                   |                                        |
| <i>Homesteads</i> | homesteads and garden                                                      | spatially-explicit,                    |
| <i>Paddy</i>      | rice cultivation land                                                      | time-invariant                         |
| <i>Sea</i>        | ocean                                                                      |                                        |
| <i>StWtr</i>      | standing water                                                             |                                        |
| <i>FlwWtr</i>     | flowing water                                                              |                                        |
| $c_{t,d_c}$       | weekly value of climate variable in week $t$ with a lag of $d_c$           |                                        |
| <i>Tavg</i>       | weekly averaged daily mean temperature                                     |                                        |
| <i>Tmax</i>       | weekly averaged maximum daily temperature                                  |                                        |
| <i>Tmin</i>       | weekly averaged minimum daily temperature                                  | time-varying, spatially                |
| <i>DTR</i>        | weekly averaged diurnal temperature range                                  | -invariant                             |
| <i>Pre</i>        | weekly total precipitation                                                 |                                        |
| <i>RD</i>         | weekly number of raining days                                              |                                        |
| <i>RH</i>         | weekly averaged daily relative humidity                                    |                                        |
| $P^i$             | population in cell $i$                                                     | spatially -explicit,<br>time-invariant |
| $V_{t-u}^i$       | number of trips made to cell $i$ in week $t-u$                             | spatially -explicit,<br>time-varying   |
| $N_{t-w}^i$       | number of patients admitted to hospital who live in cell $i$ in week $t-w$ | spatially -explicit,<br>time-varying   |

337  
 338 *Note:*  $t$ ,  $u$ , and  $w$  in weeks,  $d_c$  in days. For notation, variable superscripts in Table 1 denote spatial indices  
 339 and subscripts denote time indices.

340  
 341 Multiple models with explanatory variables representing land-use, climate, and mobility were created,  
 342 and the three representative models are presented here. The three models vary based on the type of  
 343 mobility variable included, specifically how far back in time travel is accounted for. The first model  
 344 includes the mobility patterns one-week prior ( $u = 1$ ), the second model includes the mobility patterns  
 345 two-weeks prior ( $u = 2$ ), and the third model excludes mobility altogether (“Exclude  $V$ ”). The final set of  
 346 climate and land-use variables found to be significant varies between models. All explanatory variables  
 347 were standardized to a mean of zero and a standard deviation of one in the mixed-effects model. The  
 348 fixed-effects coefficients (Table 2) therefore reflect the relative influence of each explanatory variable on  
 349 the dengue outbreak dynamics.

350

351 The results (Table 2) for each of the three models are presented for both a 1 km × 1 km and 5 km × 5 km  
352 resolution, and reveal that the mobility patterns of dengue patients, specifically the number of trips made  
353 into a cell in a given week, to be the most reliable predictor of new dengue cases in that cell the following  
354 week. Under the spatial resolution of 1 km × 1 km, the fixed-effects coefficient for the trips one week  
355 prior ( $u = 1$ ) is 0.483, which is considerably greater than the fixed-effects coefficients for other  
356 explanatory variables, suggesting human mobility plays a critical role in dengue outbreak dynamics.  
357 Results also illustrate a decrease in explanatory power of mobility patterns further than a week in advance,  
358 with the magnitude of the trips variable coefficient drastically decreased with a lead time of two weeks ( $u$   
359 = 2) to 0.078. This result highlights the importance of collecting and utilizing mobility data within an  
360 appropriate lead time for the purposes of outbreak prediction modeling. When mobility data is excluded  
361 from the model altogether, the adjusted  $R^2$  decreases from 0.419 to 0.262. In general, the power of the  
362 number of trips in predicting dengue cases deteriorates with longer lead time, with the number of trips  
363 two-weeks prior showing little advantage over other explanatory variables. The same conclusion is  
364 applicable for the results under the 5 km × 5 km resolution, as shown in Table 2.

365  
366 Among the seven land-use groups (see variable descriptions in Table 1) under the 1 km × 1 km resolution,  
367 only *BuiltUp* shows significant positive fixed effects on dengue cases, but only when the mobility  
368 variable one week prior was excluded (Table 2). Under the coarser spatial rasterization of 5 km × 5 km,  
369 *StWtr* and *Sea* also show significant positive fixed effects, in addition to *BuiltUp*. Whereas *BuiltUp* shows  
370 significant fixed effects in all three models with the coefficients ranging from 0.032 to 0.050, *StWtr*  
371 shows significant coefficients of 0.031 and 0.032 in two of the models, and *Sea* shows the significant  
372 coefficient of 0.029 only in the model with the trip variable excluded. It indicates that urban areas, areas  
373 with standing water, and areas near the coastline are associated with a higher risk of dengue infections;  
374 the effect is stronger under the 5 km × 5 km spatial resolution. In contrast, human mobility is shown to be  
375 a significant and robust predictor of dengue dynamics for both spatial resolutions.  
376

377 **Table 2: Fixed-effects coefficients and standard error of the mixed-effects model outputs based on**  
 378 **the 1 km × 1 km and 5 km × 5 km resolution, respectively. The presented results are post-completion**  
 379 **of the backward elimination of nonsignificant fixed effects. Variables without coefficients listed in**  
 380 **the table were eliminated during the backwards elimination procedure for each model (each**  
 381 **column). Variable descriptions are listed in Table 1.**

|                                                    | 1 km × 1 km          |                      |                      | 5 km × 5 km          |                     |                      |
|----------------------------------------------------|----------------------|----------------------|----------------------|----------------------|---------------------|----------------------|
|                                                    | <i>u</i> = 1         | <i>u</i> = 2         | Exclude <i>V</i>     | <i>u</i> = 1         | <i>u</i> = 2        | Exclude <i>V</i>     |
| <i>BuiltUp</i>                                     |                      | 0.050***<br>(0.013)  | 0.053***<br>(0.014)  | 0.032*<br>(0.014)    | 0.034*<br>(0.014)   | 0.050**<br>(0.016)   |
| <i>Sea</i>                                         |                      |                      |                      |                      |                     | 0.029*<br>(0.013)    |
| <i>StWtr</i>                                       |                      |                      |                      |                      | 0.031**<br>(0.011)  | 0.032**<br>(0.011)   |
| <i>Tmin</i> <sub><i>t, d<sub>Tmin</sub></i></sub>  | 0.030***<br>(0.0066) | 0.028***<br>(0.0074) | 0.026***<br>(0.0074) | 0.032***<br>(0.0088) | 0.024*<br>(0.010)   | 0.021*<br>(0.0098)   |
| <i>V</i> <sub><i>t-1</i></sub> <sup><i>i</i></sup> | 0.483***<br>(0.0080) |                      |                      | 0.417***<br>(0.015)  |                     |                      |
| <i>V</i> <sub><i>t-2</i></sub> <sup><i>i</i></sup> |                      | 0.078***<br>(0.010)  |                      |                      | 0.059**<br>(0.018)  |                      |
| <i>N</i> <sub><i>t-1</i></sub> <sup><i>i</i></sup> | 0.085***<br>(0.0076) | 0.162***<br>(0.0095) | 0.195***<br>(0.0083) | 0.204***<br>(0.016)  | 0.330***<br>(0.020) | 0.0359***<br>(0.016) |
| <i>N</i> <sub><i>t-2</i></sub> <sup><i>i</i></sup> | 0.156***<br>(0.0074) | 0.206***<br>(0.0085) | 0.217***<br>(0.0082) | 0.258***<br>(0.015)  | 0.394***<br>(0.017) | 0.403***<br>(0.016)  |
| <b>R<sup>2</sup></b>                               | 0.419                | 0.268                | 0.262                | 0.783                | 0.728               | 0.727                |
| <b>Adj. R<sup>2</sup></b>                          | 0.419                | 0.267                | 0.262                | 0.782                | 0.728               | 0.727                |
| <b>No. obs</b>                                     | 13532                | 13134                | 13532                | 2856                 | 2772                | 2856                 |

Standard errors are reported in parentheses.

*t* is in weeks, *d<sub>Tmin</sub>* = 10 days, and all variables are normalized.

\*, \*\*, \*\*\* indicates significance at the 95%, 99%, and 99.9% level, respectively.

#### 382 4. Discussion

383 The results from this study illustrate the dominant contribution of human mobility on the location and  
 384 timing of new dengue cases, relative to land-use and climate variables. The results are sensitive to the  
 385 temporal patterns of travel during the week immediately preceding the appearance of new case reports.  
 386 This was the variable with the greatest predictive power. Travel patterns two weeks prior still showed a  
 387 significant effect on dengue outbreaks, but this effect was weaker and comparable to the effects of  
 388 land-use and climate patterns. Our results are consistent with Stoddard, Forshey (11), who concluded that  
 389 visits to households by dengue infected individuals determines the infection risk, further validating our



390 use of patient home locations in the model. Furthermore, the significance of mobility in outbreak  
391 prediction was found to be robust under both spatial resolutions of 1 km × 1 km and 5 km × 5 km.

392  
393 In contrast to the role of mobility, which we found to be a consistently significant indicator of new  
394 dengue cases, the effect of land-use patterns on the number of new cases is sensitive to the spatial  
395 resolution of the models. Land-use variables played a larger explanatory role at the coarser spatial  
396 resolution of 5 km × 5 km (compared to the finer 1 km × 1 km resolution), particularly for smaller  
397 spatially-dominant land-use patterns such as *Sea* and *StWtr*. *BuiltUp* showed the strongest positive effect  
398 overall, indicating urbanization is associated with an increased risk of dengue outbreak (which is  
399 consistent with multiple previous findings (48, 49)). *StWtr* also showed significant positive effect, which  
400 is to be expected because standing water provides suitable mosquito breeding habitat (19). The positive  
401 effect of *Sea* only appeared significant when human mobility was excluded from the model. Given the  
402 significant positive correlation between *Sea* and the number of trips (Table S2), it is likely that the large  
403 travel volume towards the area near the coastline makes the study region prone to dengue outbreaks. If  
404 this pattern holds in other regions, as seems likely, that fact can be used for the spatial prioritization of  
405 resource allocation for disease case and vector surveillance and control.

406  
407 Among the climate factors, temperature-related variables including *Tavg*, *Tmin*, and *DTR*, were more  
408 strongly associated with the outbreak emergence than precipitation-related variables including *Pre* and  
409 *RD*, or *RH*, which is related to both. This finding is in accordance with (22), which concluded that  
410 “rainfall strongly modulates the timing of dengue (*e.g.*, epidemics occurred earlier during rainy years)  
411 while temperature modulates the annual number of dengue fever cases.” Based on regression analysis, we  
412 found *Tmin* with a 10-day lead time to be the best climate-based predictor of new weekly dengue cases.  
413 Given the likely robustness of this result in other regions, this fact can be used for the temporal  
414 prioritization of resources.

415  
416 In addition to human mobility, climate, and land-use variables, which were included as fixed effects,  
417 population density was incorporated using random effects in the model because population is likely to  
418 have spatially heterogeneous effects on dengue outbreaks, as noted in the *Data and Methods*. Based on  
419 the model results, the random-effects coefficients for population are mostly positive, as expected,  
420 indicating that higher population density is associated with a higher number of dengue cases (Figure S5).  
421 The most significant positive effect is seen north of the lagoon along the coastline, highlighting  
422 potentially high risk areas, where higher populations are likely to facilitate the emergence of dengue  
423 outbreaks. A few cells resulted in negative random-effects coefficients, which may be due to confounding  
424 interactions between different variables included in the model, or alternative factors not captured in the  
425 model; these cells were few in number, and only occurred in the model when the dominant mobility  
426 variable was included. It is possible the dominant role of mobility could over compensate for the impact  
427 of population, *e.g.*, because people are likely to travel to crowded downtown areas, along the lagoon, or  
428 near the ocean where the large number of trips made to those regions has the ability to offset the impact of  
429 population. That the random-effects coefficients for population density are positive and negative lends  
430 support to the modeling decision to treat it as having enough stochasticity to qualify as a random-effects  
431 variable.

432  
433 The results of this analysis have implications that are relevant to the design of measures to control dengue  
434 cases, such as allocation of resources for mosquito vector control. Previous global modeling of ecological  
435 suitability for dengue vector mosquito species (both *Aedes aegypti* and *Aedes albopictus*) have shown that  
436 the entire study area is a prime habitat for these species (50, 51). This conclusion drawn from the global  
437 models finds validation in our analysis, which shows that climate and land-use variables are not the most  
438 strongly associated with dengue case outbreaks. Consequently, epidemiological risk based on vector  
439 ecology may be insufficient for the purposes of optimizing vector control resource allocation, as it is  
440 unable to distinguish between potential sites to target within the study area. Because travel into the sites is

441 the most important predictor of new case clusters, it may well be time to optimize vector control resources  
442 based on mobility data, with the aim to prevent exposure to the day-biting mosquitoes, *i.e.*, *Aedes aegypti*,  
443 at the highest risk locations. To the best of our knowledge, such a design for dengue control measures has  
444 not yet been tried in the field.

445  
446 Finally, various limitations of this study should be noted. First, only dengue patients admitted to the  
447 CCMDDHF at the Negombo Hospital were included and surveyed in this study. Thus mild or  
448 asymptomatic cases, which account for the majority of dengue cases (1), were not accounted for in the  
449 study. Second, some patients infected in the study region may have gone to hospitals in other districts,  
450 and would therefore not be included. Third, the mobility data was based on patients' recollections over a  
451 10-day period prior to hospital admission, and therefore may have inaccuracies due to human error in  
452 recalling the information. However, detailed analysis of the travel data revealed the vast majority of trips  
453 recorded represent daily commuting routines. Thus, while some trips may be excluded due to human error,  
454 we believe the relative connectivity between cells is accurately captured by the survey responses. Fourth,  
455 the distance traveled and the time spent in a certain location were not considered due to the unavailability  
456 of relevant data; however these factors have been shown to have little influence on dengue transmission  
457 (11), and thus their exclusion does not invalidate the methodology used in this analysis. Fifth, by utilizing  
458 all the mobility data collected, we made an implicit assumption that the patients were infectious during  
459 the entire 10-day period prior to hospital admittance. This period does fall within the combined intrinsic  
460 incubation period (4-10 days) (52) and the early symptomatic period before admitted to the hospital. A  
461 sixth assumption was that the patients were infected at or around their home locations. This assumption is  
462 consistent with a wide variety of previous studies that revealed homes as the primary point of contact for  
463 dengue transmission (11, 53, 54). Vazquez-Prokopec, Montgomery (12) tried to identify the most  
464 plausible transmission locations based on reported contact locations from a dengue outbreak in Cairns,  
465 Australia and found that only 10.2% of the identified transmission sites were at out-of-home locations,  
466 and a notable portion of them were actually within 1 km of the home locations. Given that our objective  
467 was not to model the transmission chains of dengue as in (12), assuming home locations as the site of  
468 infection provides reasonable support for predicting where infected individuals reside, and therefore the  
469 risk posed around homes of infected individuals. Lastly, the climate data were obtained from a single  
470 station, thus a homogenous climatic region was assumed for our study region. Therefore, the role of  
471 climate factors on the dengue outbreak may be underestimated.

472  
473 While the modeling framework used here is readily applicable to other contexts, future work should  
474 investigate how widely transferable the model results are. More specifically using general mobility data  
475 (tracking movements for all residents); such as using mobile phone data as in (13), or transport planning  
476 data, which may be more readily available and cost effective; should be compared to the use of patient  
477 mobility surveys as in this study.

478  
479  
480 **Ethics.** The research protocol was approved by the Director of the Negombo Hospital. Patient consent  
481 was obtained in writing from all participants for the purposes of this study.

482  
483 **Data Accessibility.** Patient case reports and travel diaries can not be shared due to privacy restrictions.  
484 The remaining data used in this study is provided as a supplementary file, along with the code used to  
485 generate the results.

486  
487 **Competing Interests.** We have no competing interests.

488  
489 **Authors' Contributions.** L.G. conceived the study. Y.Z., S.Siddique and L.G. designed the experiments.  
490 Y.Z., H.S., L.F. and J.R. collected the data. Y.Z. developed the model and performed the computational

491 analysis. All authors analyzed the data and model results. Y.Z., S.Siddiqui., S.Sarkar, J.R., K.O., and L.G.,  
492 contributed to the writing of the manuscript.

493 **Acknowledgements.** We thank Dhammika Silva from the Centre for Clinical Management of Dengue and  
494 Dengue Haemorrhagic Fever who supervised the data collection and Benjamin Zaitchik at Johns Hopkins  
495 University for advice on the climate data extraction.

496  
497 **Funding.** We received no funding for this work.  
498

#### 499 **References**

- 500 1. Bhatt S, Gething PW, Brady OJ, Messina JP, Farlow AW, Moyes CL, et al. The global  
501 distribution and burden of dengue. *Nature*. 2013 04/07/online;496:504.
- 502 2. Simmons CP, Farrar JJ, van Vinh Chau N, Wills B. Dengue. *New England Journal of*  
503 *Medicine*. 2012;366(15):1423-32. PubMed PMID: 22494122.
- 504 3. Vannice KS, Roehrig JT, Hombach J. Next generation dengue vaccines: A review of the  
505 preclinical development pipeline. *Vaccine*. 2015 2015/12/10;33(50):7091-9.
- 506 4. Aldstadt J, Yoon I-K, Tannitisupawong D, Jarman RG, Thomas SJ, Gibbons RV, et al.  
507 Space-time analysis of hospitalised dengue patients in rural Thailand reveals important temporal intervals  
508 in the pattern of dengue virus transmission. *Tropical Medicine & International Health*.  
509 2012;17(9):1076-85.
- 510 5. Chadee DD. Landing periodicity of the mosquito *Aedes aegypti* in Trinidad in relation to the  
511 timing of insecticidal space-spraying. *Medical and Veterinary Entomology*. 1988;2(2):189-92.
- 512 6. Yasuno M, Tonn RJ. A study of biting habits of *Aedes aegypti* in Bangkok, Thailand. *Bulletin of*  
513 *the World Health Organization*. 1970;43(2):319-25. PubMed PMID: PMC2427649.
- 514 7. Wong J, Astete H, Morrison AC, Scott TW. Sampling Considerations for Designing *Aedes*  
515 *aegypti* (Diptera: Culicidae) Oviposition Studies in Iquitos, Peru: Substrate Preference, Diurnal  
516 Periodicity, and Gonotrophic Cycle Length. *Journal of Medical Entomology*. 2011;48(1):45-52.
- 517 8. Pathirana S, Kawabata M, Goonatilake R. Study of potential risk of dengue disease outbreak in  
518 Sri Lanka using GIS and statistical modelling. *Journal of Rural and Tropical Public Health*. 2009;8:8-17.
- 519 9. Lana RM, Gomes MFdC, Lima TFMd, Honório NA, Codeço CT. The introduction of dengue  
520 follows transportation infrastructure changes in the state of Acre, Brazil: A network-based analysis. *PLOS*  
521 *Neglected Tropical Diseases*. 2017;11(11):e0006070.
- 522 10. Reiner RC, Stoddard ST, Scott TW. Socially structured human movement shapes dengue  
523 transmission despite the diffusive effect of mosquito dispersal. *Epidemics*. 2014 2014/03/01;6:30-6.
- 524 11. Stoddard ST, Forshey BM, Morrison AC, Paz-Soldan VA, Vazquez-Prokopec GM, Astete H, et  
525 al. House-to-house human movement drives dengue virus transmission. *Proceedings of the National*  
526 *Academy of Sciences*. 2013;110(3):994-9.
- 527 12. Vazquez-Prokopec GM, Montgomery BL, Horne P, Clennon JA, Ritchie SA. Combining contact  
528 tracing with targeted indoor residual spraying significantly reduces dengue transmission. *Science*  
529 *Advances*. 2017;3(2).
- 530 13. Wesolowski A, Qureshi T, Boni MF, Sundsøy PR, Johansson MA, Rasheed SB, et al. Impact of  
531 human mobility on the emergence of dengue epidemics in Pakistan. *Proceedings of the National*  
532 *Academy of Sciences*. 2015;112(38):11887-92.
- 533 14. Adams B, Kapan DD. Man Bites Mosquito: Understanding the Contribution of Human  
534 Movement to Vector-Borne Disease Dynamics. *PLOS ONE*. 2009;4(8):e6763.
- 535 15. Stoddard ST, Morrison AC, Vazquez-Prokopec GM, Paz Soldan V, Kochel TJ, Kitron U, et al.  
536 The Role of Human Movement in the Transmission of Vector-Borne Pathogens. *PLOS Neglected*  
537 *Tropical Diseases*. 2009;3(7):e481.

- 538 16. Harrington LC, Scott TW, Lerdthusnee K, Coleman RC, Costero A, Clark GG, et al. Dispersal of  
539 the dengue vector *Aedes aegypti* within and between rural communities. *American Journal of Tropical*  
540 *Medicine and Hygiene*. 2005;72(2):209-20.
- 541 17. Hemme RR, Thomas CL, Chadee DD, Severson DW. Influence of Urban Landscapes on  
542 Population Dynamics in a Short-Distance Migrant Mosquito: Evidence for the Dengue Vector *Aedes*  
543 *aegypti*. *PLOS Neglected Tropical Diseases*. 2010;4(3):e634.
- 544 18. Getis A, Morrison AC, Gray K, Scott TW. Characteristics of the spatial pattern of the dengue  
545 vector, *Aedes aegypti*, in Iquitos, Peru. *American Journal of Tropical Medicine and Hygiene*.  
546 2003;69(5):494-505.
- 547 19. World Health Organization, Special Programme for Research, Training in Tropical Diseases,  
548 World Health Organization. Department of Control of Neglected Tropical Diseases, World Health  
549 Organization. *Epidemic & Pandemic Alert*. Dengue: guidelines for diagnosis, treatment, prevention and  
550 control: World Health Organization; 2009.
- 551 20. Xu L, Stige LC, Chan K-S, Zhou J, Yang J, Sang S, et al. Climate variation drives dengue  
552 dynamics. *Proceedings of the National Academy of Sciences*. 2017;114(1):113-8.
- 553 21. Sirisena P, Noordeen F, Kurukulasuriya H, Romesh TA, Fernando L. Effect of Climatic Factors  
554 and Population Density on the Distribution of Dengue in Sri Lanka: A GIS Based Evaluation for  
555 Prediction of Outbreaks. *PLOS ONE*. 2017;12(1):e0166806.
- 556 22. Morin CW, Monaghan AJ, Hayden MH, Barrera R, Ernst K. Meteorologically Driven  
557 Simulations of Dengue Epidemics in San Juan, PR. *PLOS Neglected Tropical Diseases*.  
558 2015;9(8):e0004002.
- 559 23. Metcalf CJE, Walter KS, Wesolowski A, Buckee CO, Shevliakova E, Tatem AJ, et al. Identifying  
560 climate drivers of infectious disease dynamics: recent advances and challenges ahead. *Proceedings of the*  
561 *Royal Society B: Biological Sciences*. 2017;284(1860).
- 562 24. Gloria-Soria A, Armstrong PM, Powell JR, Turner PE. Infection rate of *Aedes aegypti*  
563 mosquitoes with dengue virus depends on the interaction between temperature and mosquito genotype.  
564 *Proceedings of the Royal Society B: Biological Sciences*. 2017;284(1864).
- 565 25. Lambrechts L, Paaijmans KP, Fansiri T, Carrington LB, Kramer LD, Thomas MB, et al. Impact  
566 of daily temperature fluctuations on dengue virus transmission by *Aedes aegypti*.  
567 *Proceedings of the National Academy of Sciences*. 2011;108(18):7460-5.
- 568 26. Bar-Zeev M. The Effect of Temperature on the Growth Rate and Survival of the Immature Stages  
569 of *Aedes aegypti* (L.). *Bulletin of Entomological Research*. 2009;49(1):157-63. Epub 07/01.
- 570 27. Rueda LM, Patel KJ, Axtell RC, Stinner RE. Temperature-Dependent Development and Survival  
571 Rates of *Culex quinquefasciatus* and *Aedes aegypti* (Diptera: Culicidae). *Journal of Medical Entomology*.  
572 1990;27(5):892-8.
- 573 28. Tun-Lin W, Burkot TR, Kay BH. Effects of temperature and larval diet on development rates and  
574 survival of the dengue vector *Aedes aegypti* in north Queensland, Australia. *Medical and Veterinary*  
575 *Entomology*. 2000;14(1):31-7.
- 576 29. Nagao Y, Thavara U, Chitnumsup P, Tawatsin A, Chansang C, Campbell-Lendrum D. Climatic  
577 and social risk factors for *Aedes* infestation in rural Thailand. *Tropical Medicine & International Health*.  
578 2003;8(7):650-9.
- 579 30. Naish S, Dale P, Mackenzie JS, McBride J, Mengersen K, Tong S. Climate change and dengue: a  
580 critical and systematic review of quantitative modelling approaches. *BMC Infectious Diseases*. 2014  
581 March 26;14(1):167.
- 582 31. Chakravarti A, Kumaria R. Eco-epidemiological analysis of dengue infection during an outbreak  
583 of dengue fever, India. *Virology Journal*. 2005 April 14;2(1):32.
- 584 32. Vanwambeke SO, Lambin EF, Eichhorn MP, Flasse SP, Harbach RE, Oskam L, et al. Impact of  
585 Land-use Change on Dengue and Malaria in Northern Thailand. *EcoHealth*. 2007 March 01;4(1):37-51.
- 586 33. Patz JA, Daszak P, Tabor GM, Aguirre AA, Pearl M, Epstein J, et al. Unhealthy Landscapes:  
587 Policy Recommendations on Land Use Change and Infectious Disease Emergence. *Environmental Health*  
588 *Perspectives*. 2004 04/22 11/25/received 04/22/accepted;112(10):1092-8. PubMed PMID: PMC1247383.



- 589 34. Norris DE. Mosquito-borne Diseases as a Consequence of Land Use Change. *EcoHealth*. 2004  
590 March 01;1(1):19-24.
- 591 35. Cheong YL, Leitão PJ, Lakes T. Assessment of land use factors associated with dengue cases in  
592 Malaysia using Boosted Regression Trees. *Spatial and Spatio-temporal Epidemiology*. 2014  
593 2014/07/01;10:75-84.
- 594 36. Sarfraz MS, Tripathi NK, Tipdecho T, Thongbu T, Kerdthong P, Souris M. Analyzing the  
595 spatio-temporal relationship between dengue vector larval density and land-use using factor analysis and  
596 spatial ring mapping. *BMC Public Health*. 2012 October 09;12(1):853.
- 597 37. Vanwambeke SO, van Benthem BHB, Khantikul N, Burghoorn-Maas C, Panart K, Oskam L, et al.  
598 Multi-level analyses of spatial and temporal determinants for dengue infection. *International Journal of*  
599 *Health Geographics*. 2006 2006/01/18;5(1):5.
- 600 38. World Health Organization. Dengue fever - Sri Lanka: World Health Organization; 2017 [cited  
601 2018 Feb. 11]. Available from: <http://www.who.int/csr/don/19-july-2017-dengue-sri-lanka/en/>.
- 602 39. Favier C, Schmit D, Müller-Graf CDM, Cazelles B, Degallier N, Mondet B, et al. Influence of  
603 spatial heterogeneity on an emerging infectious disease: the case of dengue epidemics. *Proceedings of the*  
604 *Royal Society B: Biological Sciences*. 2005;272(1568):1171-7.
- 605 40. Epidemiology Unit in Ministry of Health of Sri Lanka. Distribution of Notification(H399)  
606 Dengue Cases by Month 2017 [cited 2018 July 13]. Available from:  
607 [http://www.epid.gov.lk/web/index.php?option=com\\_casesanddeaths&Itemid=448&lang=en](http://www.epid.gov.lk/web/index.php?option=com_casesanddeaths&Itemid=448&lang=en).
- 608 41. National Centers for Environmental Information (NCEI). Global Surface Summary of the Day  
609 (GSOD) U.S.: NOAA/NESDIS/NCEI; 2015 [updated February 8, 2018; cited 2017 September 19].  
610 Available from: <https://catalog.data.gov/dataset/global-surface-summary-of-the-day-gsod>.
- 611 42. Wickramagamage P. Seasonality and spatial pattern of rainfall of Sri Lanka: Exploratory factor  
612 analysis. *International Journal of Climatology*. 2010;30(8):1235-45.
- 613 43. Bright EA, Rose AN, Urban ML, McKee JJ. *LandScan 2016*. 2016 ed. Oak Ridge, TN: Oak  
614 Ridge National Laboratory; 2017.
- 615 44. Survey Department of Sri Lanka. Spatial Data Infrastructure 2018 [cited 2018 June 29]. Available  
616 from: [https://www.survey.gov.lk/nsdi/lis/index\\_cad.php](https://www.survey.gov.lk/nsdi/lis/index_cad.php).
- 617 45. Romeo-Aznar V, Paul R, Telle O, Pascual M. Mosquito-borne transmission in urban landscapes:  
618 the missing link between vector abundance and human density. *Proceedings of the Royal Society B:*  
619 *Biological Sciences*. 2018;285(1884).
- 620 46. Schmidt W-P, Suzuki M, Dinh Thiem V, White RG, Tsuzuki A, Yoshida L-M, et al. Population  
621 Density, Water Supply, and the Risk of Dengue Fever in Vietnam: Cohort Study and Spatial Analysis.  
622 *PLOS Medicine*. 2011;8(8):e1001082.
- 623 47. Sirisena PDNN, Noordeen F. Evolution of dengue in Sri Lanka—changes in the virus, vector, and  
624 climate. *International Journal of Infectious Diseases*. 2014 2014/02/01;19:6-12.
- 625 48. Gubler DJ. Dengue and Dengue Hemorrhagic Fever. *Clinical Microbiology Reviews*.  
626 1998;11(3):480-96. PubMed PMID: PMC88892.
- 627 49. Gubler DJ. Epidemic dengue/dengue hemorrhagic fever as a public health, social and economic  
628 problem in the 21st century. *Trends in Microbiology*. 2002 2002/02/01;10(2):100-3.
- 629 50. Gardner L, Sarkar S. A Global Airport-Based Risk Model for the Spread of Dengue Infection via  
630 the Air Transport Network. *PLOS ONE*. 2013;8(8):e72129.
- 631 51. Gardner LM, Fajardo D, Waller ST, Wang O, Sarkar S. A Predictive Spatial Model to Quantify  
632 the Risk of Air-Travel-Associated Dengue Importation into the United States and Europe. *Journal of*  
633 *Tropical Medicine*. 2012;2012.
- 634 52. World Health Organization. Dengue and severe dengue 2018 [cited 2018 July 29]. Available  
635 from: <http://www.who.int/news-room/fact-sheets/detail/dengue-and-severe-dengue>.
- 636 53. Mammen MP, Jr., Pimgate C, Koenraadt CJM, Rothman AL, Aldstadt J, Nisalak A, et al. Spatial  
637 and Temporal Clustering of Dengue Virus Transmission in Thai Villages. *PLOS Medicine*.  
638 2008;5(11):e205.



639 54. Yoon I-K, Getis A, Aldstadt J, Rothman AL, Tannitisupawong D, Koenraadt CJM, et al. Fine  
640 Scale Spatiotemporal Clustering of Dengue Virus Transmission in Children and *Aedes aegypti* in Rural  
641 Thai Villages. *PLOS Neglected Tropical Diseases*. 2012;6(7):e1730.

642

643
